# Supplementary material for: Driver, Collision and Meteorological Characteristics of Motor Vehicle Collisions among Road Trauma Survivors
Source: MDPI journal article supplement (doi:10.3390/ijerph182111380), 2021-10-29
Supplement: s1 [file s1]

## Supplementary Materials

**Table S1.** Model fit parameters with each increase in the number of classes.

|                                    | Number of Classes |             |             |             |             |             |
|------------------------------------|-------------------|-------------|-------------|-------------|-------------|-------------|
|                                    | 1                 | 2           | 3           | 4           | 5           | 6           |
| Iterations for convergence         | 16                | 30          | 93          | 335         | 413         | 1389        |
| Adjusted BIC                       | 5192.39           | 2892.28     | 1993.25     | 1756.07     | 1698.40     | 1746.44     |
| BIC                                | 5233.70           | 2978.07     | 2123.52     | 1930.82     | 1917.64     | 2010.16     |
| AIC                                | 5156.82           | 2818.40     | 1881.05     | 1605.55     | 1509.58     | 1519.31     |
| Entropy R <sup>2</sup>             | 1.00              | 0.91        | 0.92        | 0.83        | 0.79        | 0.76        |
| Log-likelihood of fixed parameters | -14662.95         | -13479.74   | -12997.07   | -12845.32   | -12783.33   | -12774.20   |
| Proportion (SE) of cases per class |                   |             |             |             |             |             |
| Class 1                            | 1.00 (1.00)       | 0.56 (0.01) | 0.56 (0.01) | 0.32 (0.03) | 0.31 (0.03) | 0.13 (0.04) |
| Class 2                            |                   | 0.44 (0.01) | 0.16 (0.01) | 0.24 (0.03) | 0.25 (0.03) | 0.15 (0.04) |
| Class 3                            |                   |             | 0.28 (0.01) | 0.28 (0.01) | 0.18 (0.02) | 0.18 (0.02) |
| Class 4                            |                   |             |             | 0.16 (0.01) | 0.16 (0.01) | 0.11 (0.02) |
| Class 5                            |                   |             |             |             | 0.11 (0.02) | 0.16 (0.01) |
| Class 6                            |                   |             |             |             |             | 0.28 (0.03) |

**Table S2.** Comparison of latent class characteristics, N = 2467.

|                             |                                  | Class 1 (n = 663) | Class 2 (n = 600) | Class 3 (n = 711) | Class 4 (n = 365) | Class 5 (n = 128) |         |
|-----------------------------|----------------------------------|-------------------|-------------------|-------------------|-------------------|-------------------|---------|
|                             |                                  | N (%)             | p-Value |
| Fault attribution           | Another at fault                 | 115 (17.3)        | 15 (2.5)          | 40 (5.6)          | 22 (6.0)          | 109 (85.2)        | <0.001  |
|                             | Claim another at fault           | 26 (3.9)          | 12 (2.0)          | 23 (3.2)          | 11 (3.0)          | 19 (14.8)         |         |
|                             | No other at fault                | 362 (54.6)        | 386 (64.3)        | 450 (63.3)        | 233 (63.8)        | 0 (0.0)           |         |
|                             | Deny another at fault            | 9 (1.4)           | 24 (4.0)          | 12 (1.7)          | 7 (1.9)           | 0 (0.0)           |         |
|                             | Unknown if another was at fault  | 151 (22.8)        | 163 (27.2)        | 186 (26.2)        | 92 (25.2)         | 0 (0.0)           |         |
| Age (years)                 | 15 to 24                         | 38 (5.7)          | 96 (16.0)         | 238 (33.5)        | 94 (25.8)         | 14 (10.9)         | <0.001  |
|                             | 25 to 34                         | 59 (8.9)          | 85 (14.2)         | 187 (26.3)        | 50 (13.7)         | 21 (16.4)         |         |
|                             | 35 to 44                         | 64 (9.7)          | 81 (13.5)         | 131 (18.4)        | 82 (22.5)         | 30 (23.4)         |         |
|                             | 45 to 54                         | 83 (12.5)         | 86 (14.3)         | 76 (10.7)         | 48 (13.2)         | 25 (19.5)         |         |
|                             | 55 to 64                         | 104 (15.7)        | 98 (16.3)         | 39 (5.5)          | 40 (11.0)         | 20 (15.6)         |         |
|                             | 65 to 74                         | 128 (19.3)        | 70 (11.7)         | 26 (3.7)          | 24 (6.6)          | 16 (12.5)         |         |
|                             | 75+                              | 187 (28.2)        | 84 (14.0)         | 14 (2.0)          | 27 (7.4)          | <5                |         |
| Sex                         | Male                             | 293 (44.2)        | 388 (64.7)        | 545 (76.7)        | 245 (67.1)        | 81 (63.3)         | <0.001  |
|                             | Female                           | 370 (55.8)        | 212 (35.3)        | 166 (23.3)        | 120 (32.9)        | 47 (36.7)         |         |
| Preferred Language, English | No                               | 22 (4.2)          | 13 (2.7)          | 13 (2.3)          | 11 (3.7)          | <5                | 0.23    |
|                             | Yes                              | 504 (95.8)        | 476 (97.3)        | 557 (97.7)        | 289 (96.3)        | 100 (99.0)        |         |
| Residential Area            | Regional and remote areas        | 200 (30.4)        | 310 (52.5)        | 230 (32.9)        | 165 (45.7)        | 17 (13.6)         | <0.001  |
|                             | Major cities                     | 458 (69.6)        | 280 (47.5)        | 469 (67.1)        | 196 (54.3)        | 108 (86.4)        |         |
| IRSAD (quintile)            | 1, highest level of disadvantage | 136 (20.7)        | 124 (21.0)        | 172 (24.6)        | 75 (20.8)         | 19 (15.2)         | 0.007   |
|                             | 2                                | 113 (17.2)        | 139 (23.6)        | 150 (21.5)        | 91 (25.2)         | 22 (17.6)         |         |
|                             | 3                                | 126 (19.1)        | 117 (19.8)        | 144 (20.6)        | 80 (22.2)         | 30 (24.0)         |         |
|                             | 4                                | 136 (20.7)        | 111 (18.8)        | 120 (17.2)        | 58 (16.1)         | 24 (19.2)         |         |
|                             | 5, highest level of advantage    | 147 (22.3)        | 99 (16.8)         | 113 (16.2)        | 57 (15.8)         | 30 (24.0)         |         |
| Education level             | Did not complete high school     | 281 (45.2)        | 238 (42.0)        | 284 (41.9)        | 142 (40.6)        | 29 (23.4)         | <0.001  |
|                             | Advanced diploma                 | 166 (26.7)        | 166 (29.3)        | 223 (32.9)        | 101 (28.9)        | 54 (43.5)         |         |
|                             | Completed high school            | 76 (12.2)         | 79 (13.9)         | 99 (14.6)         | 53 (15.1)         | 20 (16.1)         |         |
|                             | University                       | 99 (15.9)         | 84 (14.8)         | 72 (10.6)         | 54 (15.4)         | 21 (16.9)         |         |

|                                    |                                                    | Class 1 (n = 663) | Class 2 (n = 600) | Class 3 (n = 711) | Class 4 (n = 365) | Class 5 (n = 128) | <i>p</i> -Value |
|------------------------------------|----------------------------------------------------|-------------------|-------------------|-------------------|-------------------|-------------------|-----------------|
|                                    |                                                    | N (%)             |                 |
| Occupation skill level/status      | Not working                                        | 346 (56.1)        | 205 (37.1)        | 143 (22.3)        | 96 (28.8)         | 22 (18.3)         | <0.001          |
|                                    | Elementary/labourers                               | 48 (7.8)          | 61 (11.0)         | 81 (12.7)         | 45 (13.5)         | 15 (12.5)         |                 |
|                                    | Intermediate                                       | 63 (10.2)         | 66 (11.9)         | 119 (18.6)        | 52 (15.6)         | 29 (24.2)         |                 |
|                                    | Trade/ advanced clerical                           | 36 (5.8)          | 90 (16.3)         | 156 (24.4)        | 54 (16.2)         | 24 (20.0)         |                 |
|                                    | Associate professionals                            | 29 (4.7)          | 31 (5.6)          | 32 (5.0)          | 17 (5.1)          | 8 (6.7)           |                 |
|                                    | Managers/ professionals                            | 73 (11.8)         | 71 (12.8)         | 65 (10.2)         | 49 (14.7)         | 15 (12.5)         |                 |
| CCI conditions                     | Studying                                           | 22 (3.6)          | 29 (5.2)          | 44 (6.9)          | 20 (6.0)          | 7 (5.8)           | <0.001          |
|                                    | No                                                 | 542 (82.2)        | 479 (80.1)        | 498 (70.2)        | 301 (82.5)        | 106 (82.8)        |                 |
|                                    | Yes                                                | 117 (17.8)        | 119 (19.9)        | 211 (29.8)        | 64 (17.5)         | 22 (17.2)         |                 |
| Pre-injury mental health condition | No                                                 | 591 (90.1)        | 539 (90.7)        | 622 (88.0)        | 328 (90.9)        | 120 (93.8)        | 0.21            |
|                                    | Yes                                                | 65 (9.9)          | 55 (9.3)          | 85 (12.0)         | 33 (9.1)          | 8 (6.3)           |                 |
| Pre-injury substance use condition | No                                                 | 631 (96.2)        | 551 (92.8)        | 551 (77.9)        | 323 (89.5)        | 124 (96.9)        | <0.001          |
|                                    | Yes                                                | 25 (3.8)          | 43 (7.2)          | 156 (22.1)        | 38 (10.5)         | 4 (3.1)           |                 |
| Pre-injury disability              | No                                                 | 445 (77.1)        | 412 (81.3)        | 486 (85.9)        | 260 (83.6)        | 105 (91.3)        | <0.001          |
|                                    | Yes                                                | 132 (22.9)        | 95 (18.7)         | 80 (14.1)         | 51 (16.4)         | 10 (8.7)          |                 |
| ISS (tertiles)                     | 1–10                                               | 234 (35.3)        | 214 (35.7)        | 231 (32.5)        | 128 (35.1)        | 46 (35.9)         | 0.68            |
|                                    | 11–17                                              | 230 (34.7)        | 226 (37.7)        | 277 (39.0)        | 142 (38.9)        | 50 (39.1)         |                 |
|                                    | 18–75                                              | 199 (30.0)        | 160 (26.7)        | 203 (28.6)        | 95 (26.0)         | 32 (25.0)         |                 |
| Injured body regions               | Orthopaedic injuries only                          | 166 (25.0)        | 179 (29.8)        | 164 (23.1)        | 98 (26.8)         | 33 (25.8)         | 0.020           |
|                                    | Chest/abdominal (with/without additional injuries) | 269 (40.6)        | 233 (38.8)        | 260 (36.6)        | 131 (35.9)        | 53 (41.4)         |                 |
|                                    | Head injury                                        | 75 (11.3)         | 68 (11.3)         | 92 (12.9)         | 34 (9.3)          | 10 (7.8)          |                 |
|                                    | Spinal cord injury                                 | 6 (0.9)           | 7 (1.2)           | 12 (1.7)          | <5                | 0 (0.0)           |                 |
|                                    | Other/multi-trauma injuries                        | 147 (22.2)        | 113 (18.8)        | 183 (25.7)        | 101 (27.7)        | 32 (25.0)         |                 |

Notes: Values between 1–5 are suppressed.

**Table S3.** Five class solution in random sample 1 and 2 without covariates.

|           | Another at Fault |      | Multi-Vehicle Collision |      | Others Seriously Injured |      | BAC > = 0.05 |      | Injury Location Regional/Remote |      | Inclement Weather |      | Weekend |      | before Sunrise |      | after Sunrise |      | Daytime |      | before Sunset |      | after Sunset |      | Evening |      |
|-----------|------------------|------|-------------------------|------|--------------------------|------|--------------|------|---------------------------------|------|-------------------|------|---------|------|----------------|------|---------------|------|---------|------|---------------|------|--------------|------|---------|------|
|           | S1               | S2   | S1                      | S2   | S1                       | S2   | S1           | S2   | S1                              | S2   | S1                | S2   | S1      | S2   | S1             | S2   | S1            | S2   | S1      | S2   | S1            | S2   | S1           | S2   | S1      | S2   |
| Class 1   | 0.47             | 0.33 | 1.00                    | 1.00 | 0.31                     | 0.28 | 0.00         | 0.04 | 0.23                            | 0.31 | 0.21              | 0.23 | 0.25    | 0.25 | 0.01           | 0.01 | 0.00          | 0.00 | 1.00    | 1.00 | 0.00          | 0.00 | 0.00         | 0.00 | 0.00    | 0.00 |
| Class 2   | 0.03             | 0.05 | 0.21                    | 0.00 | 0.08                     | 0.11 | 0.07         | 0.12 | 0.61                            | 0.63 | 0.22              | 0.23 | 0.25    | 0.25 | 0.03           | 0.01 | 0.00          | 0.00 | 1.00    | 1.00 | 0.00          | 0.00 | 0.00         | 0.00 | 0.00    | 0.00 |
| Class 3   | 0.00             | 0.08 | 0.18                    | 0.01 | 0.04                     | 0.07 | 0.45         | 0.36 | 0.48                            | 0.50 | 0.28              | 0.33 | 0.32    | 0.45 | 0.00           | 0.00 | 0.00          | 0.00 | 0.00    | 0.00 | 0.00          | 0.00 | 0.00         | 0.00 | 1.00    | 1.00 |
| Class 4 * | 0.18             | 0.25 | 0.60                    | 0.60 | 0.16                     | 0.19 | 0.17         | 0.11 | 0.43                            | 0.44 | 0.25              | 0.31 | 0.23    | 0.24 | 0.16           | 0.15 | 0.27          | 0.24 | 0.00    | 0.00 | 0.35          | 0.29 | 0.22         | 0.32 | 0.00    | 0.00 |
| Class 5 * | 0.39             | 0.34 | 0.86                    | 0.99 | 0.32                     | 0.26 | 0.27         | 0.25 | 0.09                            | 0.19 | 0.36              | 0.29 | 0.44    | 0.33 | 0.00           | 0.00 | 0.00          | 0.00 | 0.00    | 0.00 | 0.00          | 0.00 | 0.00         | 0.00 | 1.00    | 1.00 |

Abbreviations: S = sample. \* Class 4 was actually Class 5 for Sample 2, and vice versa.

**Table S4.** Five class solution in random sample 1 and 2 with covariates of age and sex.

|           | Another at Fault |      | Multi-Vehicle Collision |      | Others Seriously Injured |      | BAC > = 0.05 |      | Injury Location Regional/Remote |      | Inclement Weather |      | Weekend |      | before Sunrise |      | after sunrise |      | Daytime |      | before Sunset |      | after Sunset |      | Evening |             |
|-----------|------------------|------|-------------------------|------|--------------------------|------|--------------|------|---------------------------------|------|-------------------|------|---------|------|----------------|------|---------------|------|---------|------|---------------|------|--------------|------|---------|-------------|
|           | S1               | S2   | S1                      | S2   | S1                       | S2   | S1           | S2   | S1                              | S2   | S1                | S2   | S1      | S2   | S1             | S2   | S1            | S2   | S1      | S2   | S1            | S2   | S1           | S2   | S1      | S2          |
| Class 1   | 0.42             | 0.37 | 1.00                    | 1.00 | 0.28                     | 0.31 | 0.00         | 0.02 | 0.31                            | 0.28 | 0.20              | 0.21 | 0.25    | 0.27 | 0.01           | 0.00 | 0.00          | 0.00 | 1.00    | 1.00 | 0.00          | 0.00 | 0.00         | 0.00 | 0.00    | 0.00        |
| Class 2   | 0.04             | 0.05 | 0.10                    | 0.12 | 0.08                     | 0.10 | 0.08         | 0.16 | 0.60                            | 0.63 | 0.22              | 0.26 | 0.23    | 0.24 | 0.00           | 0.00 | 0.00          | 0.00 | 1.00    | 1.00 | 0.00          | 0.00 | 0.00         | 0.00 | 0.00    | 0.00        |
| Class 3   | 0.16             | 0.07 | 0.51                    | 0.11 | 0.18                     | 0.07 | 0.36         | 0.36 | 0.31                            | 0.50 | 0.33              | 0.33 | 0.38    | 0.43 | 0.00           | 0.00 | 0.00          | 0.00 | 0.00    | 0.00 | 0.00          | 0.00 | 0.00         | 0.00 | 1.00    | 1.00        |
| Class 4 * | 0.08             | 0.25 | 0.42                    | 0.63 | 0.10                     | 0.20 | 0.13         | 0.10 | 0.55                            | 0.44 | 0.34              | 0.31 | 0.27    | 0.24 | 0.29           | 0.17 | 0.36          | 0.23 | 0.00    | 0.00 | 0.24          | 0.28 | 0.10         | 0.31 | 0.00    | 0.00        |
| Class 5 * | 0.37             | 0.41 | 0.93                    | 1.00 | 0.30                     | 0.29 | 0.23         | 0.18 | 0.15                            | 0.14 | 0.07              | 0.31 | 0.18    | 0.31 | 0.00           | 0.00 | 0.00          | 0.00 | 0.00    | 0.00 | 0.55          | 0.00 | 0.45         | 0.00 | 0.00    | <b>1.00</b> |

Abbreviations: S = sample. \* Note that Class 4 in sample 1 had the characteristics of Class 5 for Sample 2, and vice versa.

**Table S5.** EQ-5D summary score descriptive statistics and estimated mean differences, N = 2532.

|                             |                                  | EQ-5D Summary Score |                        |                        | Mean Difference<br>(95%CI)  | Mean Difference,<br>Adjusted (95%CI) |
|-----------------------------|----------------------------------|---------------------|------------------------|------------------------|-----------------------------|--------------------------------------|
|                             |                                  | 6 Months<br>m (sd)  | 12<br>Months<br>m (sd) | 24<br>Months<br>m (sd) |                             |                                      |
| MVA, latent class           | 1                                | 0.63 (0.26)         | 0.67 (0.24)            | 0.65 (0.26)            | reference                   | reference                            |
|                             | 2                                | 0.69 (0.24)         | 0.7 (0.25)             | 0.69 (0.26)            | <b>0.04 (0.01, 0.06)</b>    | 0.02 (−0.01, 0.05)                   |
|                             | 3                                | 0.67 (0.25)         | 0.69 (0.26)            | 0.68 (0.27)            | <b>0.03 (0.00, 0.05)</b>    | 0.00 (−0.02, 0.03)                   |
|                             | 4                                | 0.68 (0.23)         | 0.69 (0.25)            | 0.70 (0.26)            | <b>0.04 (0.01, 0.07)</b>    | 0.02 (−0.01, 0.05)                   |
|                             | 5                                | 0.60 (0.23)         | 0.63 (0.26)            | 0.62 (0.24)            | −0.02 (−0.06, 0.02)         | −0.03 (−0.07, 0.01)                  |
| Age (years)                 | 15 to 24                         | 0.74 (0.22)         | 0.76 (0.23)            | 0.78 (0.23)            | reference                   | reference                            |
|                             | 25 to 34                         | 0.64 (0.24)         | 0.66 (0.26)            | 0.67 (0.27)            | <b>−0.10 (−0.13, −0.07)</b> | <b>−0.10 (−0.13, −0.07)</b>          |
|                             | 35 to 44                         | 0.62 (0.26)         | 0.65 (0.25)            | 0.64 (0.26)            | <b>−0.12 (−0.15, −0.09)</b> | <b>−0.11 (−0.14, −0.08)</b>          |
|                             | 45 to 54                         | 0.61 (0.26)         | 0.63 (0.27)            | 0.63 (0.27)            | <b>−0.13 (−0.16, −0.10)</b> | <b>−0.11 (−0.15, −0.08)</b>          |
|                             | 55 to 64                         | 0.65 (0.24)         | 0.67 (0.24)            | 0.66 (0.25)            | <b>−0.09 (−0.12, −0.06)</b> | <b>−0.08 (−0.12, −0.05)</b>          |
|                             | 65 to 74                         | 0.67 (0.24)         | 0.69 (0.24)            | 0.65 (0.26)            | <b>−0.09 (−0.12, −0.05)</b> | −0.04 (−0.08, 0.00)                  |
|                             | 75+                              | 0.67 (0.24)         | 0.68 (0.23)            | 0.64 (0.25)            | <b>−0.09 (−0.12, −0.06)</b> | −0.03 (−0.07, 0.01)                  |
| Sex                         | Male                             | 0.67 (0.25)         | 0.69 (0.25)            | 0.68 (0.26)            | reference                   | reference                            |
|                             | Female                           | 0.64 (0.24)         | 0.66 (0.25)            | 0.66 (0.25)            | <b>−0.03 (−0.05, −0.01)</b> | <b>−0.04 (−0.05, −0.02)</b>          |
| Preferred Language, English | No                               | 0.59 (0.27)         | 0.59 (0.29)            | 0.57 (0.27)            | reference                   | reference                            |
|                             | Yes                              | 0.67 (0.25)         | 0.69 (0.25)            | 0.68 (0.26)            | <b>0.06 (0.01, 0.12)</b>    | 0.04 (−0.01, 0.10)                   |
| Residential Area            | Regional and remote areas        | 0.67 (0.24)         | 0.69 (0.24)            | 0.69 (0.25)            | reference                   | reference                            |
|                             | Major cities                     | 0.65 (0.25)         | 0.68 (0.26)            | 0.66 (0.27)            | −0.01 (−0.03, 0.00)         | −0.02 (−0.04, 0.00)                  |
| IRSAD (quintile)            | 1, highest level of disadvantage | 0.63 (0.26)         | 0.65 (0.25)            | 0.64 (0.26)            | reference                   | reference                            |
|                             | 2                                | 0.65 (0.25)         | 0.70 (0.23)            | 0.67 (0.26)            | <b>0.03 (0.00, 0.06)</b>    | <b>0.03 (0.01, 0.06)</b>             |
|                             | 3                                | 0.67 (0.25)         | 0.66 (0.27)            | 0.68 (0.25)            | <b>0.03 (0.00, 0.06)</b>    | <b>0.03 (0.01, 0.06)</b>             |
|                             | 4                                | 0.66 (0.25)         | 0.69 (0.25)            | 0.68 (0.27)            | <b>0.03 (0.01, 0.06)</b>    | <b>0.04 (0.01, 0.07)</b>             |
|                             | 5, highest level of advantage    | 0.69 (0.23)         | 0.71 (0.25)            | 0.69 (0.26)            | <b>0.05 (0.03, 0.08)</b>    | <b>0.06 (0.03, 0.09)</b>             |
| Education level             | Did not complete high school     | 0.64 (0.26)         | 0.66 (0.26)            | 0.64 (0.27)            | reference                   | reference                            |
|                             | Advanced diploma                 | 0.67 (0.24)         | 0.68 (0.23)            | 0.69 (0.25)            | <b>0.03 (0.01, 0.06)</b>    | <b>0.03 (0.00, 0.05)</b>             |
|                             | Completed high school            | 0.69 (0.25)         | 0.7 (0.26)             | 0.72 (0.24)            | <b>0.05 (0.02, 0.08)</b>    | <b>0.03 (0.01, 0.06)</b>             |

|                                    |                                                    | EQ-5D Summary Score |                        |                        | Mean Difference<br>(95%CI)  | Mean Difference,<br>Adjusted (95%CI) |
|------------------------------------|----------------------------------------------------|---------------------|------------------------|------------------------|-----------------------------|--------------------------------------|
|                                    |                                                    | 6 Months<br>m (sd)  | 12<br>Months<br>m (sd) | 24<br>Months<br>m (sd) |                             |                                      |
| CCI conditions                     | University                                         | 0.69 (0.22)         | 0.72 (0.24)            | 0.72 (0.26)            | <b>0.06 (0.04, 0.09)</b>    | <b>0.05 (0.03, 0.08)</b>             |
|                                    | Yes                                                | 0.64 (0.26)         | 0.65 (0.26)            | 0.63 (0.26)            | reference                   | reference                            |
|                                    | No                                                 | 0.67 (0.24)         | 0.69 (0.24)            | 0.69 (0.26)            | <b>0.04 (0.02, 0.06)</b>    | <b>0.03 (0.01, 0.05)</b>             |
| Pre-injury mental health condition | No                                                 | 0.66 (0.25)         | 0.68 (0.25)            | 0.68 (0.26)            | reference                   | reference                            |
|                                    | Yes                                                | 0.64 (0.26)         | 0.66 (0.27)            | 0.64 (0.28)            | −0.03 (−0.06, 0.00)         | 0.00 (−0.03, 0.03)                   |
| Pre-injury substance use condition | No                                                 | 0.66 (0.25)         | 0.68 (0.25)            | 0.68 (0.26)            | reference                   | reference                            |
|                                    | Yes                                                | 0.64 (0.25)         | 0.66 (0.25)            | 0.64 (0.28)            | −0.03 (−0.06, 0.00)         | 0.00 (−0.04, 0.03)                   |
| Pre-injury disability              | No                                                 | 0.68 (0.25)         | 0.7 (0.25)             | 0.69 (0.26)            | reference                   | reference                            |
|                                    | Yes                                                | 0.60 (0.25)         | 0.62 (0.25)            | 0.61 (0.26)            | <b>−0.08 (−0.10, −0.06)</b> | <b>−0.05 (−0.08, −0.03)</b>          |
| Occupation skill level/status      | Elementary/labourers                               | 0.66 (0.26)         | 0.67 (0.26)            | 0.67 (0.25)            | reference                   | reference                            |
|                                    | Intermediate                                       | 0.66 (0.25)         | 0.68 (0.26)            | 0.68 (0.26)            | 0.01 (−0.03, 0.04)          | 0.02 (−0.01, 0.05)                   |
|                                    | Trade/ advanced clerical                           | 0.69 (0.24)         | 0.71 (0.23)            | 0.73 (0.24)            | <b>0.04 (0.00, 0.07)</b>    | 0.01 (−0.02, 0.04)                   |
|                                    | Professionals                                      | 0.69 (0.23)         | 0.72 (0.22)            | 0.72 (0.23)            | <b>0.04 (0.00, 0.07)</b>    | <b>0.04 (0.00, 0.07)</b>             |
|                                    | Not working                                        | 0.63 (0.25)         | 0.64 (0.26)            | 0.62 (0.27)            | <b>−0.04 (−0.07, −0.01)</b> | −0.03 (−0.07, 0.00)                  |
| Fault attribution                  | Studying                                           | 0.69 (0.23)         | 0.73 (0.26)            | 0.74 (0.26)            | <b>0.05 (0.01, 0.09)</b>    | 0.00 (−0.04, 0.04)                   |
|                                    | Another at fault                                   | 0.63 (0.24)         | 0.66 (0.24)            | 0.65 (0.23)            | reference                   | reference                            |
|                                    | Claim another at fault                             | 0.62 (0.26)         | 0.65 (0.25)            | 0.64 (0.27)            | −0.01 (−0.06, 0.03)         | −0.03 (−0.07, 0.02)                  |
|                                    | No other at fault                                  | 0.68 (0.24)         | 0.70 (0.25)            | 0.69 (0.26)            | 0.04 (0.01, 0.06)           | 0.02 (−0.01, 0.05)                   |
|                                    | Deny another at fault                              | 0.67 (0.24)         | 0.65 (0.26)            | 0.70 (0.22)            | 0.01 (−0.05, 0.08)          | 0.00 (−0.07, 0.06)                   |
|                                    | Unknown if another was at fault                    | 0.65 (0.26)         | 0.67 (0.27)            | 0.66 (0.27)            | 0.01 (−0.02, 0.04)          | 0.00 (−0.03, 0.03)                   |
| ISS (tertiles)                     | 1–10                                               | 0.68 (0.24)         | 0.69 (0.24)            | 0.70 (0.24)            | reference                   | reference                            |
|                                    | 11–17                                              | 0.67 (0.24)         | 0.69 (0.25)            | 0.68 (0.26)            | −0.01 (−0.03, 0.01)         | <b>−0.04 (−0.06, −0.02)</b>          |
|                                    | 18–75                                              | 0.62 (0.26)         | 0.66 (0.26)            | 0.64 (0.28)            | <b>−0.05 (−0.07, −0.03)</b> | <b>−0.10 (−0.13, −0.07)</b>          |
| Injured body regions               | Orthopaedic injuries only                          | 0.66 (0.25)         | 0.69 (0.23)            | 0.69 (0.24)            | reference                   | reference                            |
|                                    | Chest/abdominal (with/without additional injuries) | 0.66 (0.25)         | 0.67 (0.26)            | 0.66 (0.27)            | −0.01 (−0.03, 0.01)         | <b>0.06 (0.03, 0.08)</b>             |
|                                    | Head injury                                        | 0.70 (0.24)         | 0.72 (0.23)            | 0.70 (0.25)            | <b>0.03 (0.00, 0.06)</b>    | <b>0.10 (0.07, 0.14)</b>             |
|                                    | Spinal cord injury                                 | 0.32 (0.32)         | 0.44 (0.33)            | 0.45 (0.33)            | <b>−0.26 (−0.34, −0.17)</b> | <b>−0.20 (−0.28, −0.12)</b>          |
|                                    | Other/multi-trauma injuries                        | 0.67 (0.24)         | 0.68 (0.26)            | 0.67 (0.26)            | 0.00 (−0.03, 0.02)          | 0.01 (−0.01, 0.04)                   |

|                    |           | EQ-5D Summary Score |             |             | Mean Difference<br>(95%CI) | Mean Difference,<br>Adjusted (95%CI) |
|--------------------|-----------|---------------------|-------------|-------------|----------------------------|--------------------------------------|
|                    |           | 6 Months            | 12 Months   | 24 Months   |                            |                                      |
|                    |           | m (sd)              | m (sd)      | m (sd)      |                            |                                      |
| Months post-injury | 6 months  | 0.66 (0.25)         |             |             | reference                  | reference                            |
|                    | 12 months |                     | 0.68 (0.25) |             | <b>0.02 (0.01, 0.03)</b>   | <b>0.02 (0.01, 0.03)</b>             |
|                    | 24 months |                     |             | 0.67 (0.26) | <b>0.01 (0.00, 0.02)</b>   | <b>0.01 (0.00, 0.02)</b>             |

Notes: Missing data were imputed for the following covariates: latent class (253 cases), preferred language (498 cases), residential area and IRSAD (27 cases), education level (132 cases), occupation group (36 cases), preinjury mental health and substance use condition (21 cases), preinjury disability (228 cases). Significant associations are emphasised in bold.

**Table S6.** Return to work descriptive statistics and estimated mean differences, N = 1529.

|                             |                                  | Return to Work |            |            | OR (95%CI)               | AOR (95%CI)              |
|-----------------------------|----------------------------------|----------------|------------|------------|--------------------------|--------------------------|
|                             |                                  | 6 Months       | 12 Months  | 24 Months  |                          |                          |
|                             |                                  | n (%)          | n (%)      | n (%)      |                          |                          |
| MVA, latent class           | 1                                | 113 (48.9)     | 141 (60.0) | 129 (60.8) | 1.00                     | 1.00                     |
|                             | 2                                | 174 (60.0)     | 192 (65.5) | 180 (65.9) | <b>2.75 (1.33, 5.69)</b> | 1.81 (0.91, 3.59)        |
|                             | 3                                | 229 (56.3)     | 241 (61.5) | 218 (63.9) | 1.81 (0.91, 3.60)        | 1.55 (0.77, 3.13)        |
|                             | 4                                | 111 (53.9)     | 126 (64.0) | 112 (67.5) | <b>2.40 (1.10, 5.23)</b> | 1.66 (0.79, 3.47)        |
|                             | 5                                | 33 (37.5)      | 48 (52.2)  | 42 (53.2)  | 0.49 (0.18, 1.33)        | 0.37 (0.13, 1.05)        |
| Age (years)                 | 15 to 24                         | 206 (65.2)     | 233 (73.0) | 217 (78.3) | 1.00                     | 1.00                     |
|                             | 25 to 34                         | 127 (48.3)     | 149 (58.2) | 138 (60.5) | <b>0.09 (0.05, 0.20)</b> | <b>0.10 (0.05, 0.19)</b> |
|                             | 35 to 44                         | 143 (48.5)     | 158 (55.2) | 137 (58.1) | <b>0.07 (0.03, 0.15)</b> | <b>0.07 (0.04, 0.15)</b> |
|                             | 45 to 54                         | 120 (50.2)     | 137 (58.5) | 135 (61.1) | <b>0.11 (0.05, 0.22)</b> | <b>0.15 (0.07, 0.29)</b> |
|                             | 55 to 64                         | 108 (54.8)     | 116 (59.8) | 102 (58.3) | <b>0.12 (0.06, 0.27)</b> | <b>0.09 (0.04, 0.20)</b> |
|                             | 65 to 74                         | 31 (55.4)      | 34 (59.6)  | 27 (52.9)  | <b>0.09 (0.03, 0.29)</b> | <b>0.05 (0.01, 0.15)</b> |
|                             | 75+                              | 11 (52.4)      | 15 (62.5)  | 14 (58.3)  | <b>0.13 (0.03, 0.64)</b> | <b>0.10 (0.02, 0.49)</b> |
| Sex                         | Male                             | 513 (53.2)     | 582 (60.9) | 536 (64.0) | 1.00                     | 1.00                     |
|                             | Female                           | 233 (55.1)     | 260 (62.8) | 234 (62.6) | 1.19 (0.79, 1.79)        | 0.66 (0.42, 1.03)        |
| Preferred Language, English | No                               | 9 (45.0)       | 9 (45.0)   | 9 (47.4)   | 1.00                     | 1.00                     |
|                             | Yes                              | 604 (55.0)     | 672 (62.4) | 607 (64.9) | 4.89 (0.81, 29.45)       | 3.15 (0.61, 16.17)       |
| Residential Area            | Regional and remote areas        | 314 (54.0)     | 355 (62.1) | 332 (64.6) | 1.00                     | 1.00                     |
|                             | Major cities                     | 426 (53.9)     | 476 (60.9) | 431 (62.7) | 0.85 (.057, 1.28)        | 0.76 (0.48, 1.18)        |
| IRSAD (quintile)            | 1, highest level of disadvantage | 130 (46.9)     | 147 (54.9) | 136 (54.0) | 1.00                     | 1.00                     |
|                             | 2                                | 166 (51.4)     | 192 (60.6) | 180 (64.3) | <b>2.44 (1.30, 4.58)</b> | <b>2.71 (1.49, 4.91)</b> |

|                                    |                                                    | Return to Work |             |             |                             |                            |
|------------------------------------|----------------------------------------------------|----------------|-------------|-------------|-----------------------------|----------------------------|
|                                    |                                                    | 6 Months       | 12 Months   | 24 Months   |                             |                            |
|                                    |                                                    | n (%)          | n (%)       | n (%)       | OR (95%CI)                  | AOR (95%CI)                |
| Education level                    | 3                                                  | 154 (51.2)     | 181 (59.9)  | 172 (66.2)  | <b>2.53 (1.33, 4.81)</b>    | <b>1.90 (1.04, 3.45)</b>   |
|                                    | 4                                                  | 148 (59.7)     | 163 (64.7)  | 136 (64.5)  | <b>4.10 (2.06, 8.16)</b>    | <b>3.23 (1.68, 6.20)</b>   |
|                                    | 5, highest level of advantage                      | 142 (63.4)     | 148 (68.8)  | 139 (70.2)  | <b>8.94 (3.96, 20.18)</b>   | <b>5.39 (2.54, 11.41)</b>  |
|                                    | Did not complete high school                       | 187 (47.1)     | 214 (54.2)  | 194 (55.9)  | 1.00                        | 1.00                       |
|                                    | Advanced diploma                                   | 258 (49.0)     | 312 (60.2)  | 307 (66.0)  | <b>2.53 (1.41, 4.53)</b>    | 1.67 (0.98, 2.83)          |
|                                    | Completed high school                              | 120 (62.8)     | 128 (68.4)  | 99 (66.0)   | <b>6.99 (3.27, 14.95)</b>   | <b>3.72 (1.86, 7.44)</b>   |
|                                    | University                                         | 165 (71.7)     | 171 (77.0)  | 153 (75.4)  | <b>23.27 (9.48, 57.13)</b>  | <b>8.11 (3.79, 17.35)</b>  |
| CCI conditions                     | Yes                                                | 156 (44.1)     | 168 (47.7)  | 155 (48.9)  | 1.00                        | 1.00                       |
|                                    | No                                                 | 590 (57.1)     | 674 (66.2)  | 615 (68.7)  | <b>11.10 (5.67, 21.72)</b>  | <b>6.45 (3.53, 11.77)</b>  |
| Pre-injury mental health condition | No                                                 | 687 (54.9)     | 770 (62.3)  | 704 (64.2)  | 1.00                        | 1.00                       |
|                                    | Yes                                                | 53 (42.4)      | 64 (51.6)   | 59 (55.7)   | <b>0.28 (0.13, 0.57)</b>    | 0.86 (0.41, 1.80)          |
| Pre-injury substance use condition | No                                                 | 679 (54.2)     | 767 (62.0)  | 700 (64.7)  | 1.00                        | 1.00                       |
|                                    | Yes                                                | 61 (49.2)      | 67 (55.4)   | 63 (52.5)   | <b>0.20 (0.09, 0.45)</b>    | 1.24 (0.55, 2.82)          |
| Pre-injury disability              | No                                                 | 689 (54.6)     | 730 (62.7)  | 665 (65.0)  | 1.00                        | 1.00                       |
|                                    | Yes                                                | 52 (45.6)      | 60 (54.5)   | 50 (54.3)   | <b>0.24 (0.11, 0.53)</b>    | <b>0.44 (0.21, 0.93)</b>   |
| Occupation skill level/status      | Elementary/labourers                               | 101 (41.2)     | 116 (47.2)  | 107 (48.0)  | 1.00                        | 1.00                       |
|                                    | Intermediate                                       | 160 (48.9)     | 184 (56.6)  | 166 (59.9)  | <b>3.87 (1.93, 7.78)</b>    | <b>4.16 (2.18, 7.92)</b>   |
|                                    | Trade/ advanced clerical                           | 190 (52.1)     | 233 (63.1)  | 221 (69.5)  | <b>9.07 (4.19, 19.62)</b>   | <b>3.99 (2.08, 7.66)</b>   |
|                                    | Professionals                                      | 279 (66.4)     | 296 (73.8)  | 268 (72.4)  | <b>35.67 (14.21, 89.58)</b> | <b>20.20 (9.36, 43.60)</b> |
| Fault attribution                  | Another at fault                                   | 139 (48.6)     | 168 (59.6)  | 156 (61.4)  | 1.00                        | 1.00                       |
|                                    | Claim another at fault                             | 31 (47.7)      | 38 (55.1)   | 39 (60.9)   | 0.44 (0.16, 1.18)           | 0.26 (0.10, 0.70)          |
|                                    | No other at fault                                  | 396 (55.7)     | 431 (62.0)  | 385 (64.0)  | 1.61 (0.97, 2.65)           | 0.72 (0.37, 1.37)          |
|                                    | Deny another at fault                              | 16 (61.5)      | 19 (73.1)   | 21 (91.3)   | <b>6.09 (1.61, 23.00)</b>   | 1.57 (0.38, 6.40)          |
|                                    | Unknown if another was at fault                    | 164 (54.8)     | 186 (62.4)  | 169 (62.8)  | 1.60 (0.89, 2.86)           | 0.93 (0.46, 1.88)          |
| ISS (tertiles)                     | 1–10                                               | 292 (61.1)     | 315 (66.7)  | 248 (67.2)  | 1.00                        | 1.00                       |
|                                    | 11–17                                              | 277 (55.1)     | 319 (63.9)  | 308 (67.2)  | <b>0.60 (0.39, 0.93)</b>    | <b>0.23 (0.13, 0.41)</b>   |
|                                    | 18–75                                              | 177 (43.6)     | 208 (52.1)  | 214 (55.6)  | <b>0.11 (0.06, 0.21)</b>    | <b>0.04 (0.02, 0.09)</b>   |
| Injured body regions               | Orthopaedic injuries only                          | 233 (57.11)    | 267 (65.60) | 226 (66.86) | 1.00                        | 1.00                       |
|                                    | Chest/abdominal (with/without additional injuries) | 283 (52.2)     | 322 (60.3)  | 315 (61.6)  | <b>0.55 (0.34, 0.90)</b>    | <b>5.70 (2.77, 11.73)</b>  |
|                                    | head injury                                        | 96 (54.55)     | 113 (63.84) | 117 (69.64) | 0.87 (0.46, 1.65)           | <b>13.07 (5.22, 32.73)</b> |

|                    |             | Return to Work |             |             | OR (95%CI)               | AOR (95%CI)              |
|--------------------|-------------|----------------|-------------|-------------|--------------------------|--------------------------|
|                    |             | 6 Months       | 12 Months   | 24 Months   |                          |                          |
|                    |             | n (%)          | n (%)       | n (%)       |                          |                          |
| Months post-injury | SCI         | 4 (21.05)      | 5 (26.32)   | 3 (18.75)   | <b>0.01 (0.00, 0.03)</b> | <b>0.13 (0.02, 0.95)</b> |
|                    | other/multi | 202 (54.74)    | 229 (63.43) | 194 (67.13) | 0.85 (0.50, 1.44)        | <b>1.95 (1.11, 3.43)</b> |
|                    | 6 months    | 746 (53.8)     |             |             | 1.00                     | 1.00                     |
|                    | 12 months   |                | 842 (61.5)  |             | <b>2.43 (1.90, 3.10)</b> | <b>2.52 (1.94, 3.27)</b> |
|                    | 24 months   |                |             | 770 (63.5)  | <b>3.31 (2.43, 4.50)</b> | <b>3.52 (2.53, 4.89)</b> |

Notes: Missing data were imputed for the following covariates: latent class (180 cases), preferred language (304 cases), residential area and IRSAD (18 cases), education level (57 cases), occupation group (36 cases), preinjury mental health and substance use condition (13 cases), preinjury disability (124 cases). Significant associations are emphasised in bold.

**Table S7.** GOS-E independent function outcome descriptive statistics and estimated mean differences, N = 2537.

|                             |                                  | <b>GOS-E - Independent Recovery</b> |                            |                            | <b>OR (95%CI)</b>        | <b>AOR (95%CI)</b>       |
|-----------------------------|----------------------------------|-------------------------------------|----------------------------|----------------------------|--------------------------|--------------------------|
|                             |                                  | <b>6-Months<br/>n (%)</b>           | <b>12-Months<br/>n (%)</b> | <b>24-Months<br/>n (%)</b> |                          |                          |
| MVA, latent class           | 1                                | 193 (32.9)                          | 224 (38.6)                 | 201 (37.8)                 | 1.00                     | 1.00                     |
|                             | 2                                | 154 (30.1)                          | 187 (36.7)                 | 179 (37.5)                 | 0.98 (0.68, 1.43)        | 1.06 (0.71, 1.58)        |
|                             | 3                                | 158 (27.6)                          | 185 (33.5)                 | 173 (36.9)                 | 0.77 (0.53, 1.11)        | 1.09 (0.71, 1.67)        |
|                             | 4                                | 92 (29.2)                           | 98 (32.0)                  | 94 (36.9)                  | 0.88 (0.57, 1.36)        | 1.09 (0.69, 1.73)        |
|                             | 5                                | 28 (23.9)                           | 25 (21.4)                  | 26 (27.1)                  | <b>0.43 (0.23, 0.81)</b> | 0.93 (0.45, 1.96)        |
| Age (years)                 | 15 to 24                         | 149 (33.1)                          | 180 (40.1)                 | 183 (47.8)                 | 1.00                     | 1.00                     |
|                             | 25 to 34                         | 89 (25.0)                           | 86 (25.4)                  | 87 (29.2)                  | <b>0.27 (0.17, 0.43)</b> | <b>0.24 (0.15, 0.39)</b> |
|                             | 35 to 44                         | 78 (20.6)                           | 97 (26.5)                  | 84 (28.6)                  | <b>0.22 (0.14, 0.35)</b> | <b>0.21 (0.13, 0.34)</b> |
|                             | 45 to 54                         | 65 (20.7)                           | 74 (24.1)                  | 73 (26.6)                  | <b>0.19 (0.12, 0.31)</b> | <b>0.21 (0.12, 0.35)</b> |
|                             | 55 to 64                         | 75 (25.9)                           | 87 (30.1)                  | 93 (35.6)                  | <b>0.41 (0.25, 0.65)</b> | <b>0.32 (0.19, 0.55)</b> |
|                             | 65 to 74                         | 110 (43.7)                          | 121 (48.8)                 | 99 (42.3)                  | 1.53 (0.93, 2.53)        | 0.66 (0.36, 1.21)        |
|                             | 75+                              | 125 (41.4)                          | 141 (47.3)                 | 120 (42.3)                 | 1.40 (0.89, 2.23)        | 0.55 (0.29, 1.02)        |
| Sex                         | Male                             | 425 (28.8)                          | 476 (32.8)                 | 463 (36.0)                 | 1.00                     | 1.00                     |
|                             | Female                           | 266 (30.8)                          | 310 (36.6)                 | 276 (37.2)                 | 1.22 (0.93, 1.59)        | 0.86 (0.64, 1.14)        |
| Preferred Language, English | not English                      | 15 (28.8)                           | 15 (27.8)                  | 14 (29.2)                  | 1.00                     | 1.00                     |
|                             | English                          | 569 (30.9)                          | 632 (35.2)                 | 581 (37.0)                 | 1.66 (0.66, 4.14)        | 1.53 (0.60, 3.89)        |
| Residential Area            | Regional and remote areas        | 253 (28.5)                          | 288 (33.1)                 | 276 (35.7)                 | 1.00                     | 1.00                     |
|                             | Major cities                     | 432 (30.2)                          | 490 (35.0)                 | 456 (36.8)                 | 1.11 (0.84, 1.45)        | 0.78 (0.57, 1.06)        |
| IRSAD (quintile)            | 1, highest level of disadvantage | 134 (28.1)                          | 148 (31.8)                 | 135 (32.0)                 | 1.00                     | 1.00                     |
|                             | 2                                | 123 (25.5)                          | 152 (32.6)                 | 139 (33.5)                 | 1.03 (0.68, 1.56)        | 1.28 (0.84, 1.95)        |
|                             | 3                                | 138 (28.5)                          | 155 (31.7)                 | 151 (35.3)                 | 1.16 (0.77, 1.75)        | 1.23 (0.82, 1.85)        |
|                             | 4                                | 131 (30.3)                          | 154 (36.2)                 | 147 (39.7)                 | <b>1.53 (1.01, 2.34)</b> | <b>1.70 (1.10, 2.62)</b> |
|                             | 5, highest level of advantage    | 159 (35.9)                          | 169 (39.8)                 | 160 (42.6)                 | <b>2.24 (1.46, 3.43)</b> | <b>1.95 (1.24, 3.08)</b> |
| Education level             | Did not complete high school     | 245 (30.5)                          | 261 (33.5)                 | 237 (34.0)                 | 1.00                     | 1.00                     |
|                             | Advanced diploma                 | 183 (25.1)                          | 217 (30.3)                 | 219 (34.3)                 | 0.78 (0.57, 1.07)        | 1.03 (0.74, 1.44)        |
|                             | Completed high school            | 109 (32.0)                          | 132 (39.2)                 | 117 (42.4)                 | 1.48 (0.98, 2.24)        | 1.50 (0.99, 2.29)        |
|                             | University                       | 131 (36.9)                          | 143 (41.6)                 | 135 (44.4)                 | <b>2.02 (1.35, 3.02)</b> | <b>2.31 (1.51, 3.54)</b> |
| CCI conditions              | Yes                              | 172 (25.8)                          | 194 (30.1)                 | 176 (30.0)                 | 1.00                     | 1.00                     |
|                             | No                               | 519 (31.0)                          | 592 (35.8)                 | 563 (39.0)                 | <b>1.78 (1.34, 2.38)</b> | <b>1.97 (1.39, 2.78)</b> |

|                                    |                                                    | GOS-E - Independent Recovery |                    |                    | OR (95%CI)                | AOR (95%CI)               |
|------------------------------------|----------------------------------------------------|------------------------------|--------------------|--------------------|---------------------------|---------------------------|
|                                    |                                                    | 6-Months<br>n (%)            | 12-Months<br>n (%) | 24-Months<br>n (%) |                           |                           |
| Pre-injury mental health condition | No                                                 | 632 (30.2)                   | 715 (34.8)         | 675 (37.1)         | 1.00                      | 1.00                      |
|                                    | Yes                                                | 50 (21.9)                    | 62 (27.9)          | 58 (30.1)          | <b>0.47 (0.30, 0.73)</b>  | 0.67 (0.41, 1.10)         |
| Pre-injury substance use condition | No                                                 | 628 (29.7)                   | 719 (34.7)         | 662 (36.4)         | 1.00                      | 1.00                      |
|                                    | Yes                                                | 54 (25.6)                    | 58 (28.2)          | 71 (37.0)          | 0.76 (0.50, 1.16)         | 1.32 (0.81, 2.15)         |
| Pre-injury disability              | No                                                 | 581 (30.3)                   | 624 (35.6)         | 574 (37.3)         | 1.00                      | 1.00                      |
|                                    | Yes                                                | 101 (26.0)                   | 112 (31.4)         | 109 (34.9)         | <b>0.69 (0.48, 0.98)</b>  | <b>0.41 (0.27, 0.61)</b>  |
| Occupation skill level/status      | Elementary/labourers                               | 44 (17.5)                    | 56 (22.4)          | 52 (23.6)          | 1.00                      | 1.00                      |
|                                    | Intermediate                                       | 75 (22.7)                    | 85 (25.9)          | 82 (29.7)          | 1.67 (0.97, 2.85)         | <b>2.14 (1.21, 3.79)</b>  |
|                                    | Trade/ advanced clerical                           | 88 (23.6)                    | 113 (30.5)         | 115 (36.6)         | <b>2.44 (1.44, 4.13)</b>  | <b>1.98 (1.14, 3.44)</b>  |
|                                    | Professionals                                      | 113 (26.3)                   | 137 (33.5)         | 122 (33.4)         | <b>2.67 (1.61, 4.44)</b>  | <b>2.57 (1.48, 4.45)</b>  |
|                                    | Not working                                        | 328 (41.3)                   | 336 (43.1)         | 310 (43.1)         | <b>7.77 (4.84, 12.48)</b> | <b>8.21 (4.72, 14.28)</b> |
|                                    | Studying                                           | 34 (26.0)                    | 51 (40.2)          | 53 (48.2)          | <b>5.03 (2.50, 10.12)</b> | <b>2.37 (1.15, 4.89)</b>  |
|                                    |                                                    |                              |                    |                    |                           |                           |
| Fault attribution                  | Another at fault                                   | 103 (24.3)                   | 115 (28.0)         | 106 (29.4)         | 1.00                      | 1.00                      |
|                                    | Claim another at fault                             | 27 (25.5)                    | 32 (28.1)          | 34 (32.1)          | 1.06 (0.56, 2.03)         | 0.93 (0.47, 1.88)         |
|                                    | No other at fault                                  | 401 (31.2)                   | 479 (38.3)         | 442 (40.4)         | <b>2.51 (1.76, 3.59)</b>  | <b>1.97 (1.25, 3.12)</b>  |
|                                    | Deny another at fault                              | 16 (33.3)                    | 15 (31.3)          | 14 (35.9)          | 1.56 (0.59, 4.11)         | 1.19 (0.41, 3.43)         |
|                                    | Unknown if another was at fault                    | 144 (30.2)                   | 145 (30.8)         | 143 (33.5)         | <b>1.57 (1.04, 2.39)</b>  | 1.56 (0.94, 2.59)         |
| ISS (tertiles)                     | 1–10                                               | 271 (33.9)                   | 295 (38.0)         | 230 (37.5)         | 1.00                      | 1.00                      |
|                                    | 11–17                                              | 284 (32.8)                   | 308 (36.2)         | 301 (38.6)         | 0.93 (0.68, 1.27)         | <b>0.46 (0.31, 0.69)</b>  |
|                                    | 18–75                                              | 136 (20.1)                   | 183 (27.4)         | 208 (32.8)         | <b>0.38 (0.27, 0.53)</b>  | <b>0.15 (0.09, 0.25)</b>  |
| Injured body regions               | Orthopaedic injuries                               | 182 (30.4)                   | 192 (32.9)         | 173 (35.9)         | 1.00                      | 1.00                      |
|                                    | Chest/abdominal (with/without additional injuries) | 273 (30.0)                   | 323 (36.0)         | 322 (38.4)         | 1.19 (0.86, 1.66)         | <b>3.30 (2.06, 5.29)</b>  |
|                                    | head injury                                        | 76 (29.0)                    | 83 (31.8)          | 94 (38.4)          | 1.03 (0.66, 1.63)         | <b>4.48 (2.45, 8.17)</b>  |
|                                    | SCI                                                | <5                           | <5                 | <5                 | <b>0.01 (0.00, 0.48)</b>  | <b>0.05 (0.00, 0.75)</b>  |
|                                    | other/multi                                        | 159 (29.3)                   | 186 (35.3)         | 149 (34.1)         | 1.04 (0.72, 1.52)         | 1.37 (0.92, 2.03)         |
| Months post-injury                 | 6 months                                           | 691 (29.5)                   |                    |                    | 1.00                      | 1.00                      |
|                                    | 12 months                                          |                              | 786 (34.2)         |                    | <b>1.57 (1.31, 1.89)</b>  | <b>1.57 (1.31, 1.89)</b>  |
|                                    | 24 months                                          |                              |                    | 739 (36.4)         | <b>1.97 (1.60, 2.41)</b>  | <b>1.97 (1.60, 2.41)</b>  |

Notes: Missing data were imputed for the following covariates: latent class (253 cases), preferred language (497 cases), residential area and IRSAD (28 cases), education level (134 cases), occupation group (38 cases), preinjury mental health and substance use condition (21 cases), preinjury disability (230 cases). Significant associations are emphasised in bold.
